# Supplementary material for: Insight into Genotype-Phenotype Associations through eQTL Mapping in Multiple Cell Types in Health and Immune-Mediated Disease
Source: PubMed Central journal article supplement (PMC4807835; doi:10.1371/journal.pgen.1005908), 2016-03-25

**a****IBD-HV**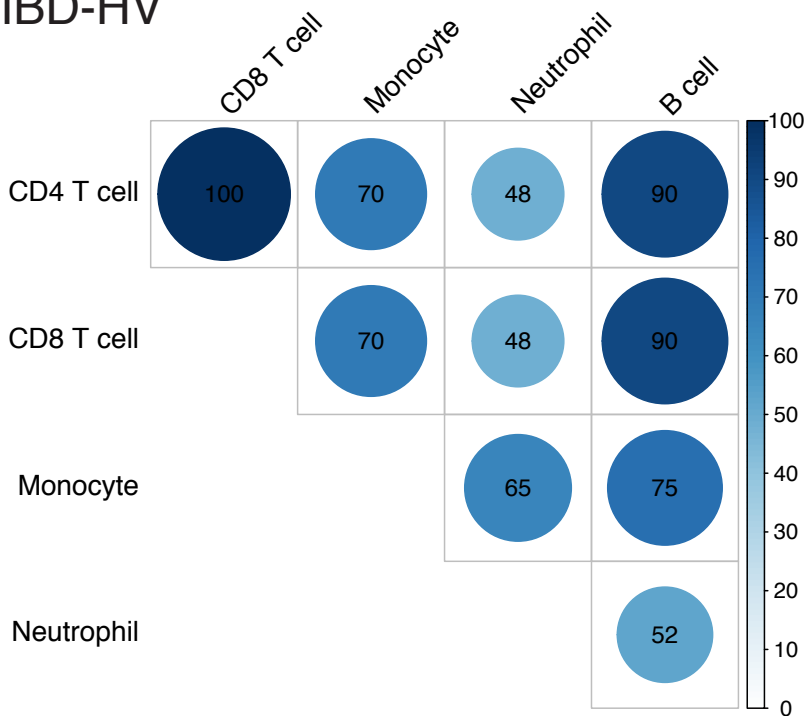**b****AAV**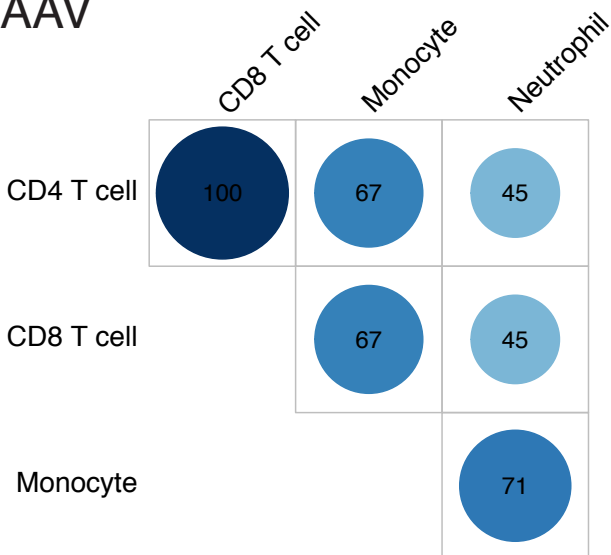

Supplement: pgen.1005908.s005.pdf [file pgen.1005908.s005.pdf]
