# Supplementary material for: Insight into Genotype-Phenotype Associations through eQTL Mapping in Multiple Cell Types in Health and Immune-Mediated Disease
Source: PubMed Central journal article supplement (PMC4807835; doi:10.1371/journal.pgen.1005908), 2016-03-25

**CD4 T cells vs. CD8 T cells**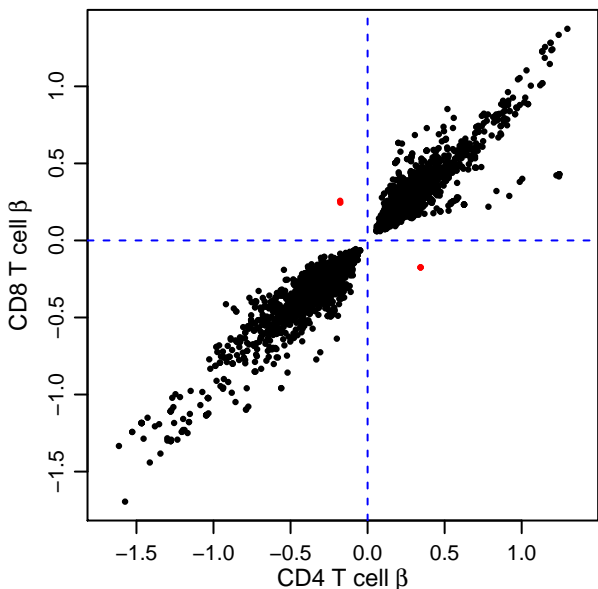**CD4 T cells vs. monocytes**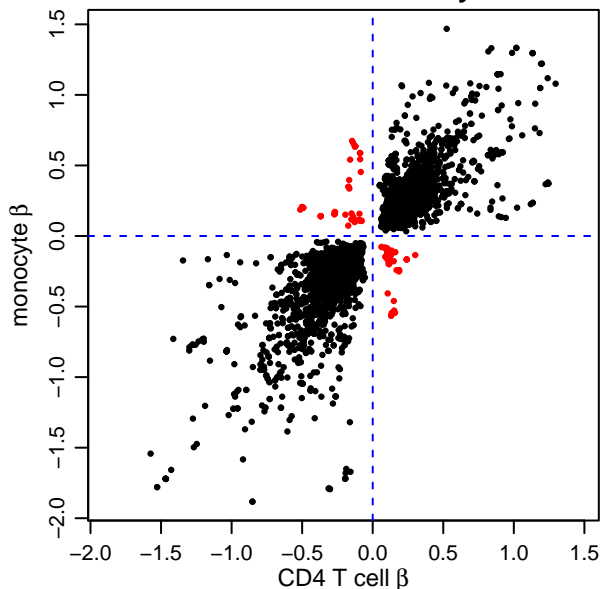**CD4 T cells vs. neutrophils**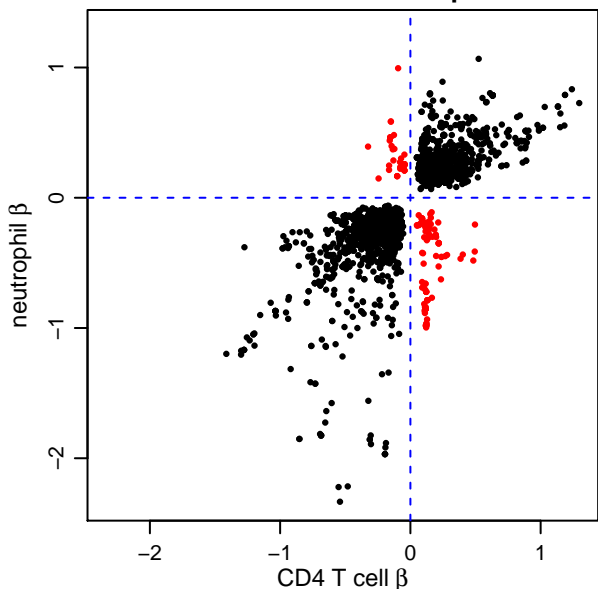**CD8 T cells vs. monocytes**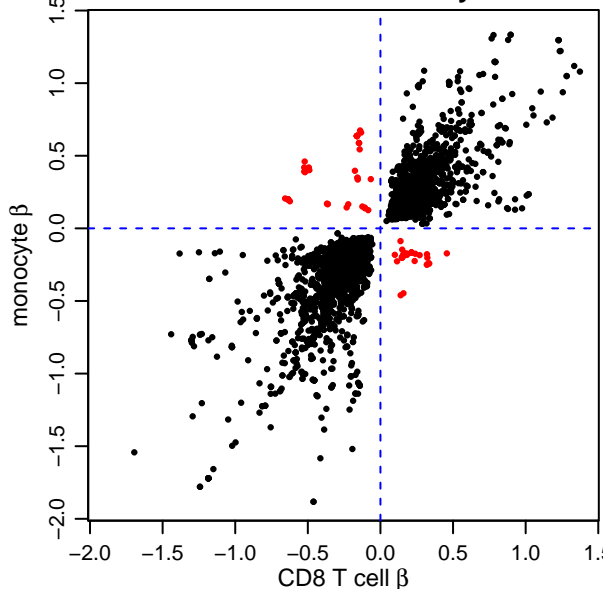**CD8 T cells vs. neutrophils**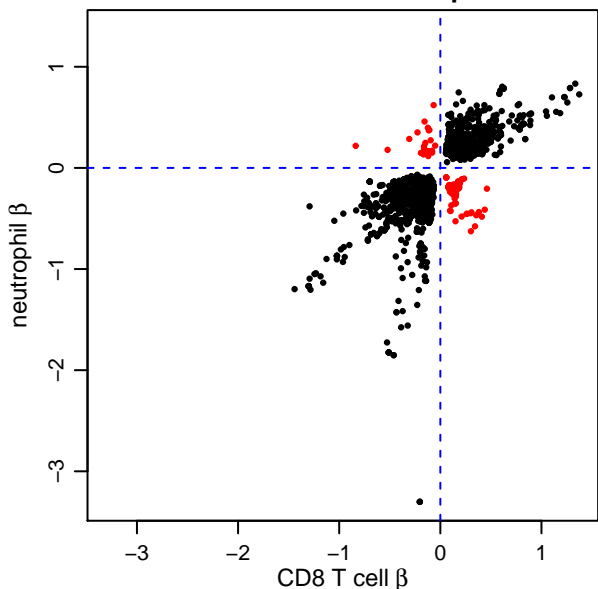**monocytes vs. neutrophils**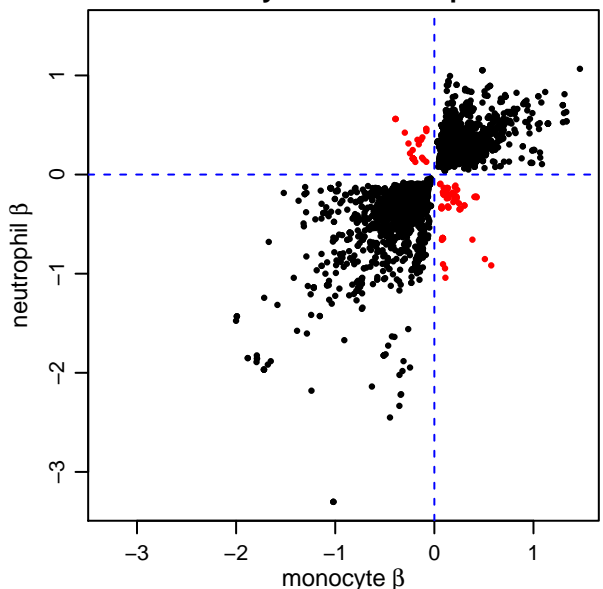

Supplement: pgen.1005908.s008.pdf [file pgen.1005908.s008.pdf]
