# Supplementary material for: Insight into Genotype-Phenotype Associations through eQTL Mapping in Multiple Cell Types in Health and Immune-Mediated Disease
Source: PubMed Central journal article supplement (PMC4807835; doi:10.1371/journal.pgen.1005908), 2016-03-25
Supplement: pgen.1005908.s009.pdf [file pgen.1005908.s009.pdf]

CD4 T cells vs. CD8 T cells

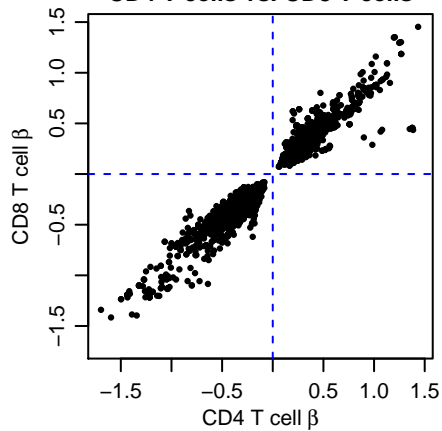

CD4 T cells vs. monocytes

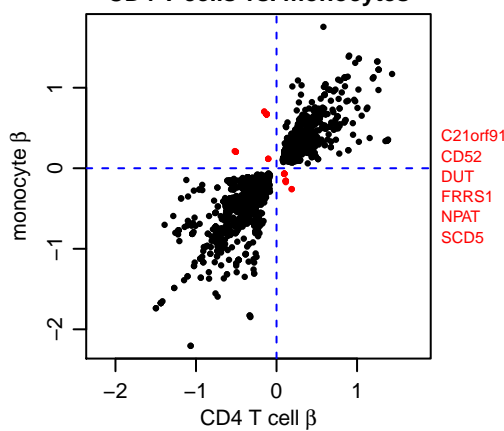

C21orf91  
CD52  
DUT  
FRRS1  
NPAT  
SCD5

CD4 T cells vs. neutrophils

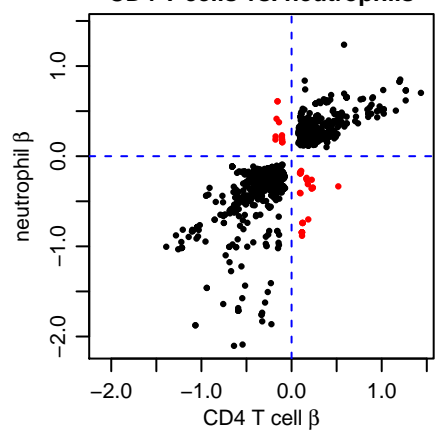

C21orf91  
DUT  
ITGB3BP  
MAPRE1  
NPAT  
OCEL1  
PPF1BP2  
SLC24A4  
STARD3NL  
TMEM106B  
UFSP2  
ZNF354A

CD4 T cells vs. B cells

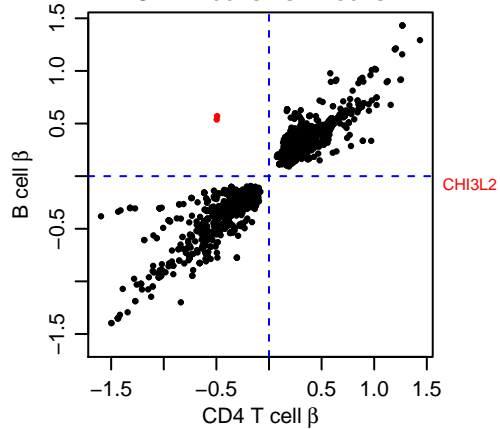

CHI3L2

CD8 T cells vs. monocytes

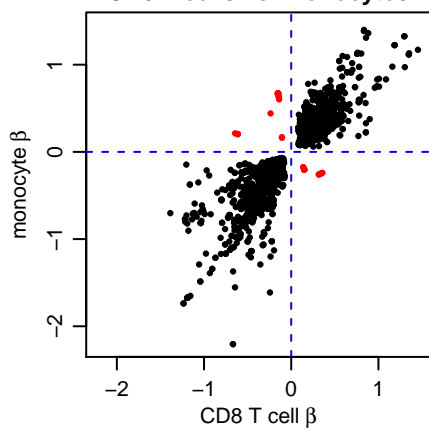

ADCY3  
CD52  
FRRS1  
ITGAE  
RPA2  
SCD5

CD8 T cells vs. neutrophils

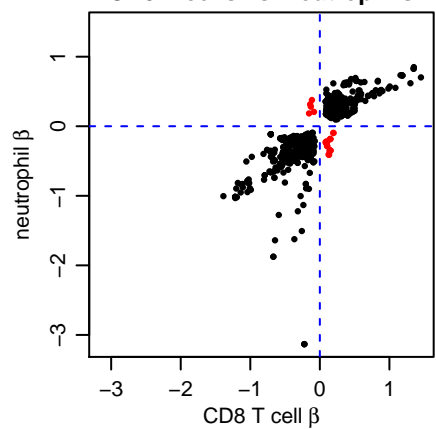

DTD1  
ITGB3BP  
NBEAL2  
RPA2  
SLC25A1  
STARD3NL  
TMEM106B  
UFSP2

CD8 T cells vs. B cells

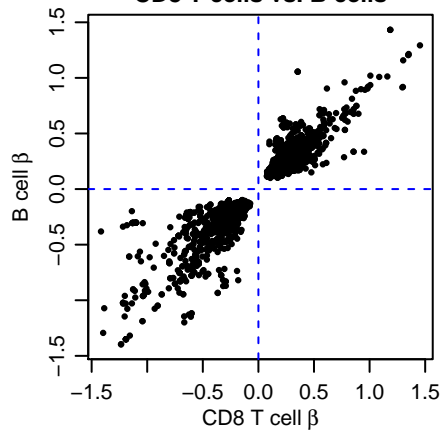

monocytes vs. neutrophils

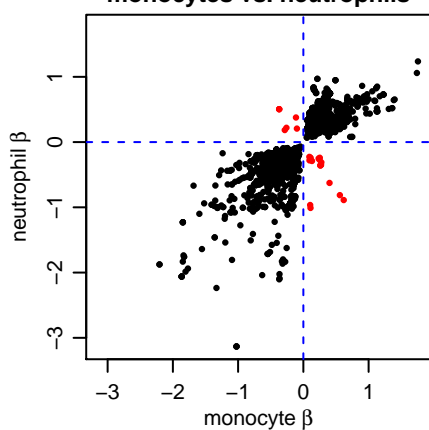

EMR1  
ITGB3BP  
NOD2  
SLC25A1  
STARD3NL  
THBD  
UFSP2

monocytes vs. B cells

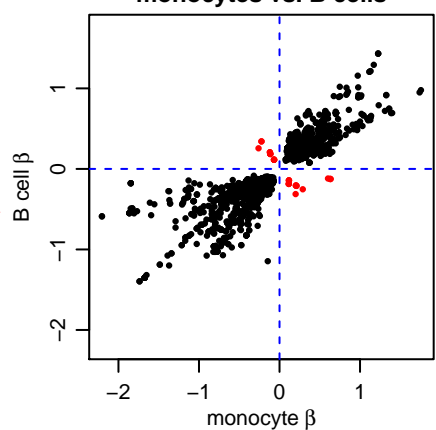

BAIAP2L1  
C21orf91  
CD52  
NPAT  
SCD5  
ZNF107

neutrophils vs. B cells

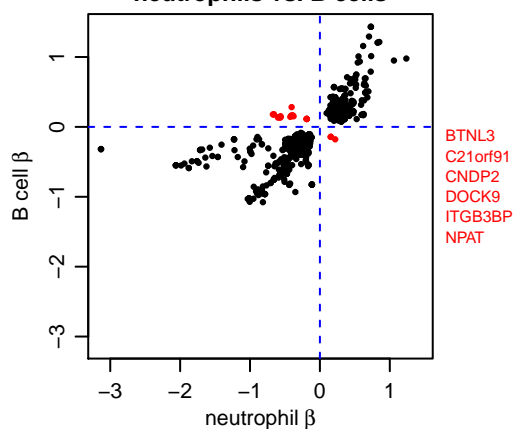

BTNL3  
C21orf91  
CNDP2  
DOCK9  
ITGB3BP  
NPAT
