# Supplementary material for: Insight into Genotype-Phenotype Associations through eQTL Mapping in Multiple Cell Types in Health and Immune-Mediated Disease
Source: PubMed Central journal article supplement (PMC4807835; doi:10.1371/journal.pgen.1005908), 2016-03-25
Supplement: pgen.1005908.s011.pdf [file pgen.1005908.s011.pdf]

CD4 T cells vs. CD8 T cells

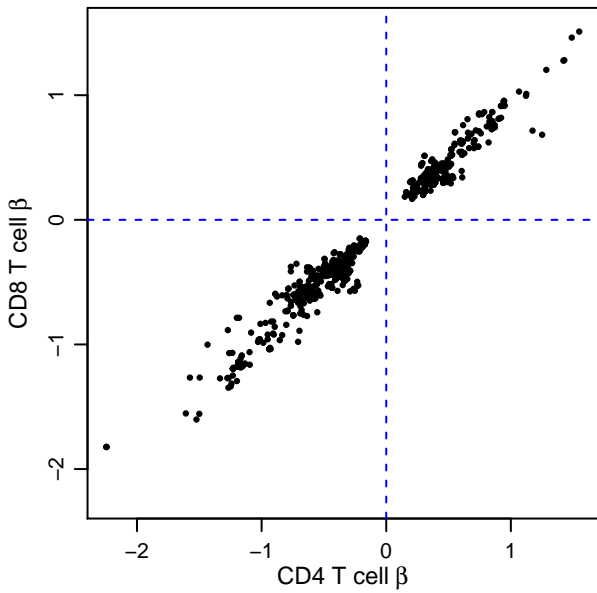

CD4 T cells vs. monocytes

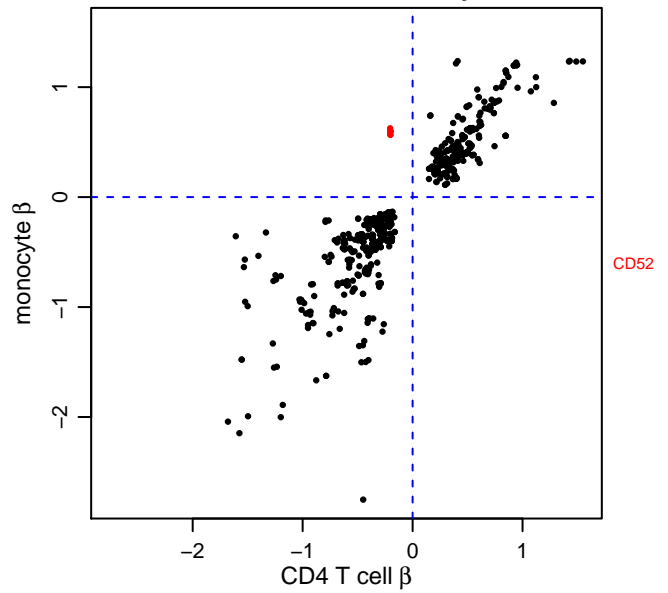

CD52

CD4 T cells vs. neutrophils

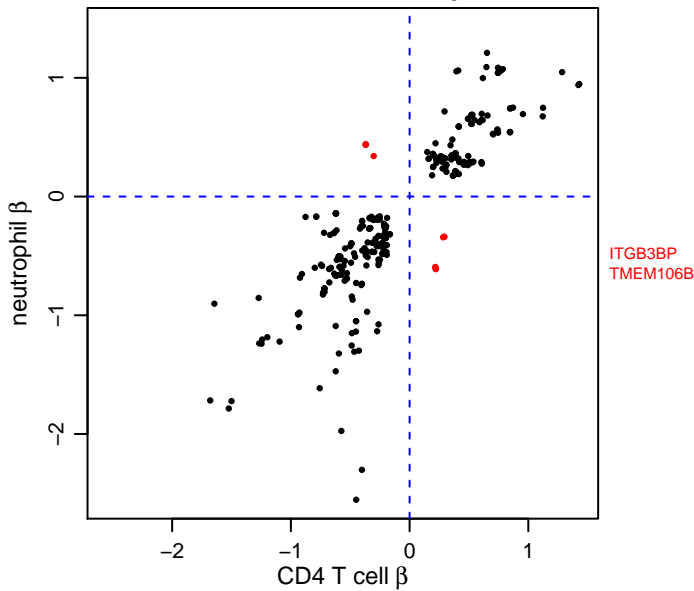

ITGB3BP  
TMEM106B

CD8 T cells vs. monocytes

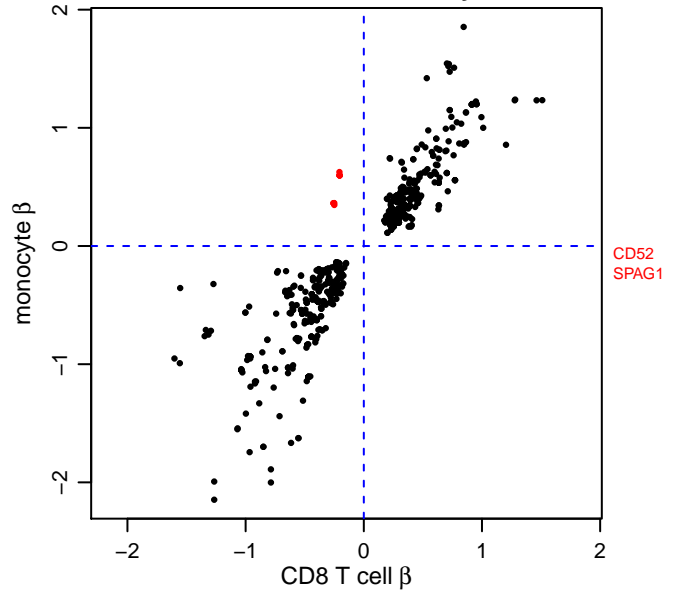

CD52  
SPAG1

CD8 T cells vs. neutrophils

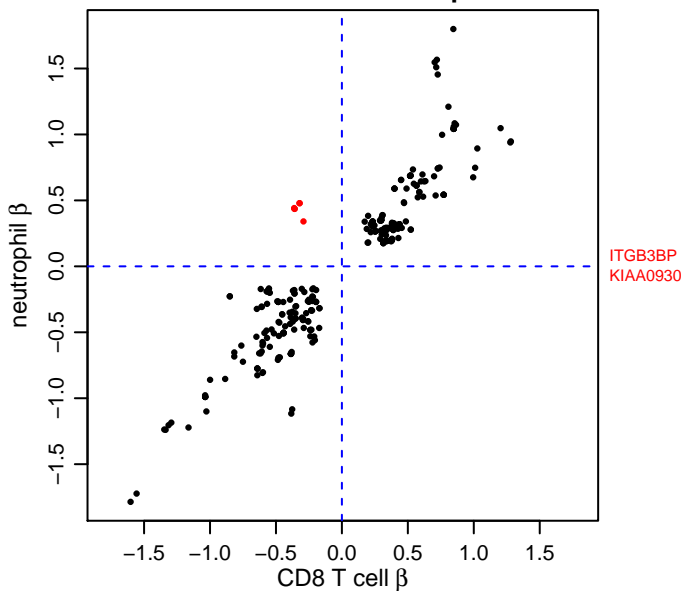

ITGB3BP  
KIAA0930

monocytes vs. neutrophils

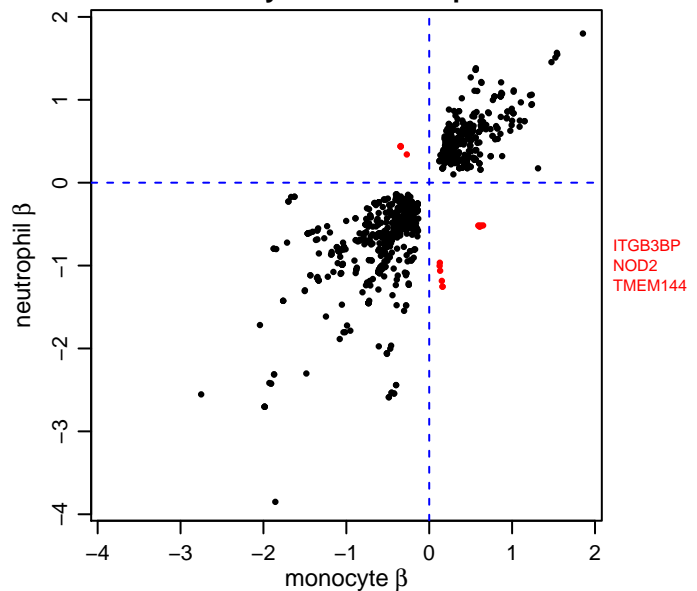

ITGB3BP  
NOD2  
TMEM144
