# Supplementary material for: Insight into Genotype-Phenotype Associations through eQTL Mapping in Multiple Cell Types in Health and Immune-Mediated Disease
Source: PubMed Central journal article supplement (PMC4807835; doi:10.1371/journal.pgen.1005908), 2016-03-25

**CD14**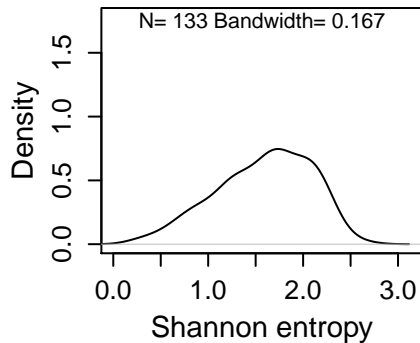**CD16**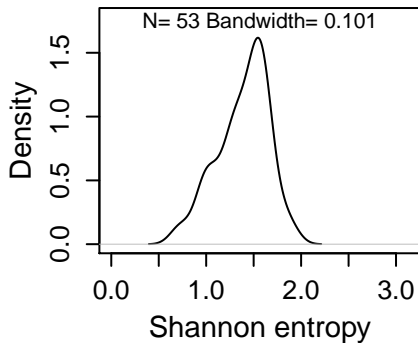**CD4-CD8**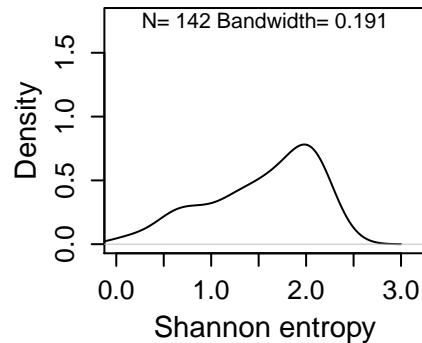**CD14-CD16**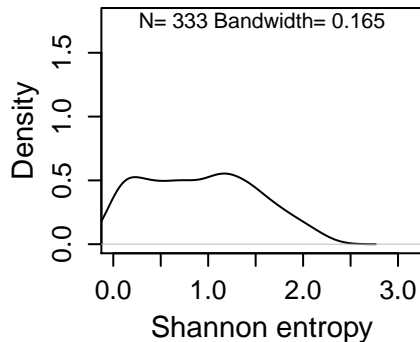**CD4-CD8-CD14**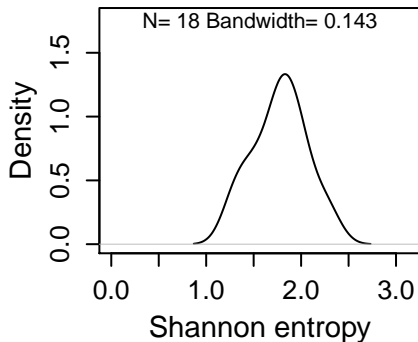**CD4-CD8-CD19**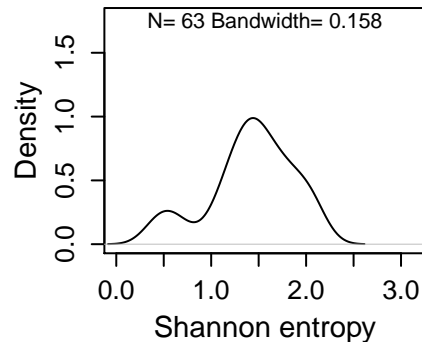**CD4-CD8-CD14-CD19**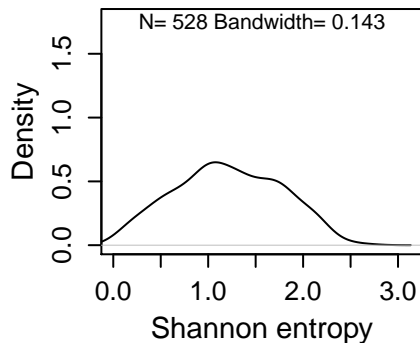**CD4-CD8-CD14-CD16-CD19**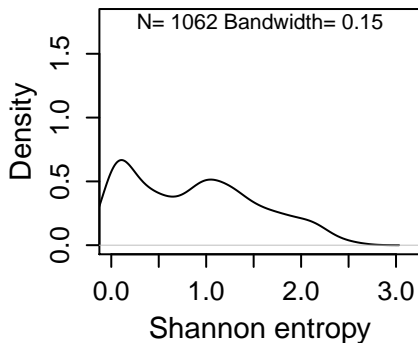**All configurations**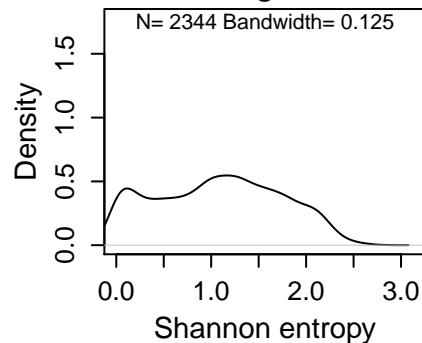

Supplement: pgen.1005908.s020.pdf [file pgen.1005908.s020.pdf]
