# Supplementary material for: Insight into Genotype-Phenotype Associations through eQTL Mapping in Multiple Cell Types in Health and Immune-Mediated Disease
Source: PLoS Genet. 2016 Mar 25;12(3):e1005908. doi: 10.1371/journal.pgen.1005908 (PMC4807835; doi:10.1371/journal.pgen.1005908)
Supplement: S5 Table — (XLSX) [file pgen.1005908.s025.xlsx]

## Sheet: tableS5.txt
patient_number	gender	diagnosis	CD4 T cell	CD8 T cell	Monocyte	Neutrophil	B cell
1403	M	Crohn's disease	FALSE	FALSE	FALSE	TRUE	FALSE
1406	M	Crohn's disease	FALSE	FALSE	FALSE	TRUE	FALSE
401	F	Crohn's disease	TRUE	FALSE	TRUE	TRUE	FALSE
405	M	Crohn's disease	TRUE	TRUE	TRUE	TRUE	TRUE
407	F	Crohn's disease	TRUE	TRUE	TRUE	TRUE	TRUE
408	F	Crohn's disease	TRUE	TRUE	TRUE	TRUE	TRUE
409	F	Crohn's disease	TRUE	TRUE	TRUE	TRUE	TRUE
411	M	Crohn's disease	TRUE	TRUE	TRUE	TRUE	TRUE
412	M	Crohn's disease	TRUE	TRUE	TRUE	TRUE	TRUE
416	M	Crohn's disease	TRUE	TRUE	TRUE	TRUE	TRUE
419	M	Crohn's disease	TRUE	TRUE	TRUE	TRUE	TRUE
421	M	Crohn's disease	TRUE	TRUE	TRUE	TRUE	TRUE
422	F	Crohn's disease	TRUE	TRUE	TRUE	TRUE	TRUE
428	F	Crohn's disease	TRUE	FALSE	TRUE	TRUE	TRUE
429	F	Crohn's disease	TRUE	TRUE	TRUE	TRUE	TRUE
430	F	Crohn's disease	TRUE	TRUE	TRUE	TRUE	TRUE
431	F	Crohn's disease	TRUE	FALSE	TRUE	TRUE	TRUE
440	F	Crohn's disease	TRUE	FALSE	TRUE	TRUE	FALSE
441	F	Crohn's disease	TRUE	TRUE	TRUE	TRUE	FALSE
444	F	Crohn's disease	TRUE	TRUE	TRUE	TRUE	FALSE
446	F	Crohn's disease	FALSE	TRUE	TRUE	TRUE	TRUE
447	F	Crohn's disease	TRUE	TRUE	FALSE	TRUE	FALSE
448	M	Crohn's disease	FALSE	TRUE	TRUE	TRUE	TRUE
450	M	Crohn's disease	TRUE	FALSE	TRUE	TRUE	TRUE
451	F	Crohn's disease	TRUE	TRUE	TRUE	TRUE	TRUE
452	M	Crohn's disease	TRUE	FALSE	FALSE	TRUE	TRUE
453	F	Crohn's disease	TRUE	FALSE	TRUE	TRUE	TRUE
454	F	Crohn's disease	TRUE	TRUE	TRUE	TRUE	TRUE
455	F	Crohn's disease	TRUE	FALSE	TRUE	TRUE	TRUE
457	F	Crohn's disease	TRUE	TRUE	TRUE	TRUE	TRUE
459	F	Crohn's disease	TRUE	TRUE	TRUE	TRUE	TRUE
463	M	Crohn's disease	TRUE	TRUE	TRUE	TRUE	TRUE
465	F	Crohn's disease	TRUE	TRUE	TRUE	TRUE	FALSE
467	F	Crohn's disease	TRUE	TRUE	TRUE	TRUE	TRUE
470	F	Crohn's disease	TRUE	TRUE	TRUE	TRUE	TRUE
476	M	Crohn's disease	TRUE	TRUE	TRUE	TRUE	TRUE
478	F	Crohn's disease	FALSE	FALSE	TRUE	TRUE	FALSE
479	F	Crohn's disease	TRUE	TRUE	TRUE	TRUE	TRUE
480	M	Crohn's disease	FALSE	TRUE	TRUE	TRUE	FALSE
481	F	Crohn's disease	TRUE	TRUE	TRUE	TRUE	TRUE
482	M	Crohn's disease	TRUE	TRUE	TRUE	TRUE	FALSE
484	F	Crohn's disease	TRUE	TRUE	TRUE	TRUE	TRUE
485	M	Crohn's disease	TRUE	TRUE	TRUE	TRUE	TRUE
486	M	Crohn's disease	TRUE	TRUE	TRUE	TRUE	TRUE
488	M	Crohn's disease	TRUE	FALSE	TRUE	FALSE	FALSE
492	F	Crohn's disease	TRUE	FALSE	TRUE	FALSE	FALSE
494	M	Crohn's disease	FALSE	FALSE	TRUE	FALSE	FALSE
496	F	Crohn's disease	FALSE	FALSE	TRUE	FALSE	FALSE
499	M	Crohn's disease	FALSE	FALSE	FALSE	TRUE	FALSE
1401	F	Ulcerative colitis	TRUE	TRUE	TRUE	TRUE	FALSE
1404	F	Ulcerative colitis	TRUE	TRUE	FALSE	TRUE	FALSE
402	F	Ulcerative colitis	FALSE	TRUE	TRUE	FALSE	FALSE
403	M	Ulcerative colitis	TRUE	TRUE	TRUE	TRUE	TRUE
404	M	Ulcerative colitis	TRUE	FALSE	TRUE	TRUE	TRUE
406	M	Ulcerative colitis	TRUE	TRUE	TRUE	TRUE	TRUE
410	F	Ulcerative colitis	TRUE	FALSE	TRUE	TRUE	TRUE
413	M	Ulcerative colitis	TRUE	FALSE	TRUE	TRUE	TRUE
415	F	Ulcerative colitis	TRUE	FALSE	TRUE	TRUE	TRUE
417	F	Ulcerative colitis	TRUE	FALSE	TRUE	TRUE	TRUE
418	F	Ulcerative colitis	TRUE	TRUE	TRUE	TRUE	TRUE
423	F	Ulcerative colitis	TRUE	TRUE	TRUE	TRUE	TRUE
424	M	Ulcerative colitis	TRUE	TRUE	TRUE	TRUE	TRUE
425	M	Ulcerative colitis	TRUE	TRUE	TRUE	TRUE	TRUE
426	M	Ulcerative colitis	TRUE	TRUE	TRUE	TRUE	TRUE
427	F	Ulcerative colitis	TRUE	TRUE	TRUE	TRUE	TRUE
433	F	Ulcerative colitis	TRUE	TRUE	TRUE	TRUE	TRUE
436	F	Ulcerative colitis	TRUE	TRUE	TRUE	TRUE	FALSE
439	F	Ulcerative colitis	TRUE	TRUE	TRUE	TRUE	FALSE
442	F	Ulcerative colitis	TRUE	TRUE	TRUE	TRUE	FALSE
443	F	Ulcerative colitis	TRUE	TRUE	TRUE	TRUE	FALSE
445	M	Ulcerative colitis	TRUE	TRUE	TRUE	TRUE	TRUE
449	M	Ulcerative colitis	TRUE	TRUE	TRUE	TRUE	TRUE
456	F	Ulcerative colitis	TRUE	TRUE	FALSE	TRUE	FALSE
458	F	Ulcerative colitis	TRUE	TRUE	TRUE	TRUE	TRUE
460	M	Ulcerative colitis	TRUE	TRUE	TRUE	TRUE	TRUE
461	M	Ulcerative colitis	TRUE	TRUE	TRUE	TRUE	TRUE
462	F	Ulcerative colitis	TRUE	TRUE	TRUE	TRUE	TRUE
464	M	Ulcerative colitis	TRUE	TRUE	TRUE	TRUE	TRUE
466	F	Ulcerative colitis	TRUE	TRUE	TRUE	TRUE	TRUE
468	F	Ulcerative colitis	TRUE	TRUE	TRUE	TRUE	TRUE
469	M	Ulcerative colitis	TRUE	TRUE	TRUE	TRUE	TRUE
472	M	Ulcerative colitis	TRUE	TRUE	TRUE	TRUE	TRUE
474	M	Ulcerative colitis	TRUE	TRUE	TRUE	TRUE	TRUE
477	F	Ulcerative colitis	TRUE	TRUE	TRUE	TRUE	TRUE
487	M	Ulcerative colitis	TRUE	FALSE	TRUE	FALSE	FALSE
489	F	Ulcerative colitis	TRUE	FALSE	TRUE	FALSE	FALSE
490	M	Ulcerative colitis	TRUE	TRUE	TRUE	FALSE	FALSE
493	M	Ulcerative colitis	FALSE	TRUE	FALSE	TRUE	FALSE
495	M	Ulcerative colitis	FALSE	FALSE	TRUE	FALSE	FALSE
497	M	Ulcerative colitis	TRUE	TRUE	TRUE	TRUE	FALSE
498	F	Ulcerative colitis	TRUE	TRUE	TRUE	TRUE	FALSE
7004	M	Control	TRUE	TRUE	TRUE	TRUE	TRUE
7007	M	Control	TRUE	TRUE	TRUE	TRUE	TRUE
7008	M	Control	TRUE	TRUE	TRUE	TRUE	TRUE
7009	M	Control	TRUE	TRUE	TRUE	TRUE	TRUE
7010	M	Control	TRUE	TRUE	TRUE	TRUE	TRUE
7011	M	Control	TRUE	TRUE	TRUE	TRUE	TRUE
7012	F	Control	TRUE	FALSE	TRUE	TRUE	FALSE
7013	F	Control	TRUE	TRUE	TRUE	TRUE	FALSE
7014	M	Control	TRUE	TRUE	TRUE	TRUE	FALSE
7015	M	Control	TRUE	TRUE	TRUE	TRUE	FALSE
7016	F	Control	TRUE	TRUE	TRUE	TRUE	FALSE
7017	F	Control	TRUE	TRUE	TRUE	TRUE	FALSE
7018	F	Control	TRUE	TRUE	TRUE	TRUE	FALSE
7019	F	Control	TRUE	TRUE	TRUE	TRUE	FALSE
7020	M	Control	TRUE	FALSE	TRUE	TRUE	FALSE
C10	F	Control	TRUE	TRUE	TRUE	TRUE	FALSE
C11	F	Control	TRUE	TRUE	TRUE	TRUE	FALSE
C12	F	Control	TRUE	TRUE	TRUE	TRUE	FALSE
C13	F	Control	TRUE	TRUE	TRUE	TRUE	FALSE
C16	F	Control	TRUE	TRUE	TRUE	TRUE	FALSE
C17	F	Control	TRUE	TRUE	TRUE	TRUE	FALSE
C18	M	Control	TRUE	TRUE	TRUE	TRUE	FALSE
C19	F	Control	TRUE	TRUE	TRUE	TRUE	TRUE
C20	F	Control	TRUE	TRUE	FALSE	TRUE	TRUE
C21	F	Control	TRUE	TRUE	TRUE	TRUE	FALSE
C22	M	Control	TRUE	TRUE	TRUE	TRUE	TRUE
C23	M	Control	TRUE	TRUE	TRUE	TRUE	TRUE
C24	M	Control	TRUE	TRUE	TRUE	FALSE	TRUE
C25	F	Control	TRUE	TRUE	TRUE	TRUE	FALSE
C26	M	Control	TRUE	TRUE	TRUE	TRUE	TRUE
C28	M	Control	TRUE	TRUE	FALSE	TRUE	FALSE
C29	F	Control	TRUE	TRUE	TRUE	TRUE	FALSE
C4	M	Control	TRUE	TRUE	TRUE	TRUE	TRUE
C503	M	Control	TRUE	TRUE	TRUE	TRUE	TRUE
C507	F	Control	TRUE	TRUE	TRUE	TRUE	TRUE
C509	F	Control	TRUE	TRUE	TRUE	TRUE	TRUE
C513	F	Control	TRUE	TRUE	TRUE	TRUE	TRUE
C519	M	Control	TRUE	TRUE	TRUE	TRUE	TRUE
C524	F	Control	TRUE	TRUE	TRUE	TRUE	TRUE
C529	M	Control	TRUE	TRUE	TRUE	TRUE	TRUE
C7	F	Control	TRUE	TRUE	TRUE	FALSE	FALSE
C8	F	Control	TRUE	TRUE	TRUE	FALSE	FALSE
C504	M	Control	FALSE	TRUE	TRUE	FALSE	FALSE
100	F	Microscopic Polyangiitis	TRUE	TRUE	TRUE	TRUE	FALSE
101	F	Microscopic Polyangiitis	TRUE	TRUE	TRUE	TRUE	FALSE
104	M	Microscopic Polyangiitis	FALSE	TRUE	TRUE	TRUE	FALSE
125	M	Microscopic Polyangiitis	FALSE	TRUE	TRUE	TRUE	FALSE
127	M	Microscopic Polyangiitis	TRUE	TRUE	TRUE	TRUE	FALSE
134	M	Microscopic Polyangiitis	TRUE	TRUE	TRUE	TRUE	FALSE
149	M	Microscopic Polyangiitis	TRUE	TRUE	TRUE	TRUE	FALSE
152	F	Microscopic Polyangiitis	TRUE	TRUE	TRUE	TRUE	FALSE
158	F	Microscopic Polyangiitis	TRUE	TRUE	TRUE	TRUE	FALSE
166	M	Microscopic Polyangiitis	TRUE	TRUE	TRUE	TRUE	FALSE
173	F	Microscopic Polyangiitis	TRUE	FALSE	TRUE	TRUE	FALSE
24	M	Microscopic Polyangiitis	TRUE	TRUE	TRUE	TRUE	FALSE
27	F	Microscopic Polyangiitis	TRUE	TRUE	TRUE	TRUE	FALSE
32	M	Microscopic Polyangiitis	TRUE	TRUE	TRUE	TRUE	FALSE
35	M	Microscopic Polyangiitis	TRUE	TRUE	TRUE	TRUE	FALSE
46	F	Microscopic Polyangiitis	TRUE	TRUE	TRUE	TRUE	FALSE
48	F	Microscopic Polyangiitis	TRUE	TRUE	TRUE	TRUE	FALSE
6	F	Microscopic Polyangiitis	TRUE	TRUE	TRUE	FALSE	FALSE
69	F	Microscopic Polyangiitis	TRUE	TRUE	TRUE	TRUE	FALSE
74	M	Microscopic Polyangiitis	TRUE	FALSE	TRUE	TRUE	FALSE
8	M	Microscopic Polyangiitis	TRUE	TRUE	TRUE	FALSE	FALSE
93	M	Microscopic Polyangiitis	FALSE	TRUE	TRUE	TRUE	FALSE
98	M	Microscopic Polyangiitis	TRUE	TRUE	TRUE	TRUE	FALSE
107	F	Wegener's Granulomatosis	FALSE	TRUE	TRUE	TRUE	FALSE
13	M	Wegener's Granulomatosis	TRUE	TRUE	TRUE	TRUE	FALSE
133	F	Wegener's Granulomatosis	TRUE	TRUE	TRUE	TRUE	FALSE
136	F	Wegener's Granulomatosis	TRUE	TRUE	TRUE	TRUE	FALSE
14	M	Wegener's Granulomatosis	TRUE	TRUE	TRUE	TRUE	FALSE
155	F	Wegener's Granulomatosis	TRUE	TRUE	TRUE	TRUE	FALSE
16	F	Wegener's Granulomatosis	TRUE	TRUE	TRUE	TRUE	FALSE
160	F	Wegener's Granulomatosis	TRUE	FALSE	TRUE	TRUE	FALSE
162	M	Wegener's Granulomatosis	TRUE	TRUE	TRUE	TRUE	FALSE
169	M	Wegener's Granulomatosis	TRUE	TRUE	TRUE	TRUE	FALSE
17	M	Wegener's Granulomatosis	TRUE	TRUE	TRUE	TRUE	FALSE
181	F	Wegener's Granulomatosis	TRUE	TRUE	TRUE	TRUE	FALSE
31	F	Wegener's Granulomatosis	TRUE	TRUE	TRUE	TRUE	FALSE
34	F	Wegener's Granulomatosis	TRUE	TRUE	TRUE	TRUE	FALSE
36	F	Wegener's Granulomatosis	TRUE	FALSE	TRUE	TRUE	FALSE
38	M	Wegener's Granulomatosis	TRUE	TRUE	TRUE	TRUE	FALSE
55	F	Wegener's Granulomatosis	TRUE	TRUE	TRUE	TRUE	FALSE
62	F	Wegener's Granulomatosis	TRUE	TRUE	TRUE	TRUE	FALSE
67	M	Wegener's Granulomatosis	FALSE	FALSE	FALSE	TRUE	FALSE
7	M	Wegener's Granulomatosis	TRUE	TRUE	TRUE	FALSE	FALSE
70	F	Wegener's Granulomatosis	TRUE	TRUE	TRUE	TRUE	FALSE
88	M	Wegener's Granulomatosis	TRUE	TRUE	TRUE	TRUE	FALSE
90	F	Wegener's Granulomatosis	TRUE	FALSE	TRUE	TRUE	FALSE
